# Supplementary material for: Heat shock antagonizes UVA-induced responses in murine melanocytes and melanoma cells: an unexpected interaction
Source: Royal Society of Chemistry journal article supplement (doi:10.1039/c6pp00330c), 2017-02-16
Supplement: c6pp00330c2.pdf [file c6pp00330c2.pdf]

**Supplementary Figure 1.** Normal (Melan-a cells) and malignant melanocytes (B16-F10 cells) in free running. Gene expression was normalized by 18S RNA transcript and expressed relative to the minimal value of each cell line in DD (A-D). Gene expression values are shown as mean  $\pm$  SEM. p values are shown in the graphs. (A) Melan-a *Per1* n = 5 – 7; (B) Melan-a *Clock* n = 3 – 8; (C) B16-F10 *Per1* n = 6 – 8; (D) B16-F10 *Per1* n = 5 – 8.

**Supplementary Figure 2.** Representative emission spectrum of the UVA lamp used in this study. Note the peak at 365 nm and a minor violet component. No UVB radiation was detected during the experiments.

**Supplementary Figure 3.** Representative temperature profile during the experiments. (A) Temperature profile of UVA radiation associated with heat shock. Fifteen min after UVA lamps were turned on a 1 °C increase was observed; after further 15 min the temperature reached 39.5 °C and then plateaued at 40°C until the end of the experiment. (B) For the UVA *per se* experiment the temperature of the incubator was set at 33 °C, then UVA lamps were turned on and 45 minutes later the temperature reached 37 °C. The cells were then placed in the incubator and received UVA radiation at 37 °C ( $\pm$  0.5 °C). The red lines represent the duration of the experiment.
